# Supplementary material for: Normalization of Hemoglobin Level in Patients with Chronic Kidney Disease and Anemia
Source: Atypon-hosted journal article supplement (doi:10.1056/nejmoa062276), 2006-11-15
Supplement: nejm_drueke_2071sa1.pdf [file nejm_drueke_2071sa1.pdf]

## Supplementary Appendix

This appendix has been provided by the authors to give readers additional information about their work.

Supplement to: Drüeke TB, Locatelli F, Clyne N, et al. Normalization of hemoglobin level in patients with chronic kidney disease and anemia. *N Engl J Med* 2006;355:2071-84.

**Appendix Table. Primary Composite Endpoint: Distribution of First Cardiovascular Events \***

|                                    | Group 1 (N = 301) | Group 2 (N = 302) |
|------------------------------------|-------------------|-------------------|
|                                    | N (%)             | N (%)             |
| Arrhythmia                         | 12 (4)            | 12 (4)            |
| Acute cardiac failure              | 7 (2)             | 12 (4)            |
| Myocardial infarction              | 8 (3)             | 7 (2)             |
| Angina pectoris                    | 7 (2)             | 4 (1)             |
| Cerebrovascular accident           | 6 (2)             | 5 (2)             |
| Transient cerebral ischemic attack | 5 (2)             | 1 (<1)            |
| Peripheral vascular disease        | 8 (3)             | 4 (1)             |
| Sudden death                       | 4 (1)             | 0                 |
| Total                              | 58 (19)           | 47 (16)           |

**\* Some patients experienced more than one cardiovascular event, which are all included in this Table, but of which only the first was counted for the primary composite endpoint.**

## GLOSSARY

Cockcroft-Gault Equation

$$C_{cr} = \frac{(140 - \text{age}) \times \text{weight} \times 0.85 \text{ if female}}{72 S_{cr}}$$

Simplified MDRD Equation

$$\text{MDRDGFR} = 186.3 \times \text{PCr (mg/dl)}^{-1.154} \times \text{age (yr)}^{-0.203} \times (1.212 \text{ if black}) \times (0.742 \text{ if female})$$

Note: calculations based on  $C_{cr}$  expressed in milliliters per minute, age in years, weight in kilograms, and serum creatinine ( $S_{cr}$ ) in milligrams per deciliter
